# Supplementary material for: A neomorphic mutation in the interferon activation domain of IRF4 causes a dominant primary immunodeficiency
Source: PubMed Central journal article supplement — J Exp Med. 2023 Mar 14;220(6):e20221292. doi: 10.1084/jem.20221292 (PMC10037104; doi:10.1084/jem.20221292), 2023-03-14
Supplement: JEM_20221292_TableS1.pdf [file JEM_20221292_TableS1.pdf]

| WT-specific | Common to WT and mutant | Mutant-specific |
|-------------|-------------------------|-----------------|
| MKI67       | IRF4                    | PTK2B           |
| TOP2A       | SF3B1                   | ARID1B          |
| HYOU1       | SMARCC1                 | ETV6            |
| GANAB       | GMPS                    | MX2             |
| POLR2A      | SMC1A                   | NFKB2           |
| NCOR1       | STOML2                  | EIF3I           |
| P4HB        | U2SURP                  | FABP5           |
| PDIA4       | CDC5L                   | CSTF1           |
| SNW1        | DDX46                   | FKBP5           |
| DNMT1       | DDX42                   | JUNB            |
| NCAPD2      | RECQL                   | SMARCE1         |
| BAZ1B       | USP24                   | CMPK1           |
| EHD1        | PDS5B                   | FNBP1           |
| HDGF        | SMARCA2                 | OAS2            |
| NUP93       | MRE11                   | RSL1D1          |
| RALY        | MSH2                    | SEPT1           |
| SUPT5H      | SMARCA4                 | BAP18           |
| EIF3E       | SRRT                    | C17orf49        |
| EWSR1       | SRSF1                   | RANGAP1         |
| HNF1B       | WDFY4                   | RCC1            |
| SNRPA1      | CSE1L                   | RNASEK-C17orf49 |
| SUB1        | DNAJA1                  | STAT6           |
| CNDP2       | POLD1                   | TRAF1           |
| CSDE1       | RAVER1                  | ANP32E          |
| GATAD2B     | SMARCA5                 | CYFIP2          |
| NUP107      | SMARCD2                 | IDI1            |
| PIIB        | DOCK2                   | VPS4B           |
| CANX        | RNF20                   |                 |
| FAM98B      | CCAR2                   |                 |
| FANCI       | MTA2                    |                 |
| MAGOH       | SMC4                    |                 |
| MAGOHB      | ARID1A                  |                 |
| OLA1        | COPB1                   |                 |
| RFC5        | CSK                     |                 |
| SF3A3       | DIS3                    |                 |
| UHRF1       | SART3                   |                 |
| CACYBP      | HCFC1                   |                 |
| CALR        | INPP5D                  |                 |
| CSNK2A1     | OGT                     |                 |
| ELMSAN1     | SMC3                    |                 |
| GATAD2A     | SMCHD1                  |                 |
| MTA1        | SMU1                    |                 |
| NAPA        | CAND1                   |                 |
| NELFB       | RAD50                   |                 |

|          |          |  |
|----------|----------|--|
| NUDT21   | SF1      |  |
| PBRM1    | STAT3    |  |
| PRDX4    | TOP1     |  |
| QARS     | USP5     |  |
| RNPS1    | CCAR1    |  |
| RRM2     | CPSF2    |  |
| SERPINB9 | NSUN2    |  |
| SNRPD1   | CDC37    |  |
| VDAC1    | ECM29    |  |
| ADSS     | EIF3B    |  |
| ARF4     | KIAA0368 |  |
| BTK      | MSH6     |  |
| CBX1     | PDS5A    |  |
| CDK11B   | PSME3    |  |
| CHAMP1   | SMARCC2  |  |
| CKAP4    | SYMPK    |  |
| CPSF3    | XRN2     |  |
| EP300    | AHNAK    |  |
| GTF3C4   | CSTF3    |  |
| KDM3B    | FKBP4    |  |
| MAT2A    | HDAC1    |  |
| MDN1     | HDAC2    |  |
| MTA3     | KHDRBS1  |  |
| MYO1E    | NUMA1    |  |
| NCAPG    | PSPC1    |  |
| NPLOC4   | USP48    |  |
| PABPC4   | RUNX3    |  |
| PDCD6IP  | SF3A1    |  |
| POGZ     | SSB      |  |
| PRPS2    | WDHD1    |  |
| PSMB4    | XPO5     |  |
| PSMC5    | ACTL6A   |  |
| PSME2    | ASNS     |  |
| RBM17    | CKAP5    |  |
| RRM1     | GEMIN5   |  |
| SMS      | HEXIM1   |  |
| SNRPA    | HNRNPH2  |  |
| SRPRA    | HNRNPUL1 |  |
| TNPO1    | PGD      |  |
| USP9X    | PPP2R1A  |  |
| COPE     | STXBP2   |  |
| EIF4H    | YWHAE    |  |
| FIP1L1   | ACIN1    |  |
| IKZF3    | ARHGDIB  |  |
| LTA4H    | BANF1    |  |

|        |         |  |
|--------|---------|--|
| MBD2   | CTBP1   |  |
| NUP133 | DDB1    |  |
| PNN    | GLRX3   |  |
| PPP1R8 | HAT1    |  |
| RAD21  | MAPRE1  |  |
| RBMX   | NOSIP   |  |
| RFC2   | PRPF6   |  |
| SNRPN  | RNF40   |  |
| TSR1   | STAG2   |  |
| ZNF281 | TARDBP  |  |
|        | TBL1XR1 |  |
|        | TRA2B   |  |
|        | VRK1    |  |
|        | YARS    |  |
|        | CALM1   |  |
|        | CALM2   |  |
|        | CALM3   |  |
|        | PRPF40A |  |
|        | PSIP1   |  |
|        | SKIV2L2 |  |
|        | ACAT2   |  |
|        | CARM1   |  |
|        | CHORDC1 |  |
|        | IRF2BP2 |  |
|        | PRPF4   |  |
|        | SUGT1   |  |
|        | THRAP3  |  |
|        | XPOT    |  |
|        | ADNP    |  |
|        | EIF3H   |  |
|        | EIF3S3  |  |
|        | EIF4G1  |  |
|        | HIC1    |  |
|        | NCOR2   |  |
|        | POLR2B  |  |
|        | PPP1CA  |  |
|        | PSMD5   |  |
|        | TRIM33  |  |
|        | ABCE1   |  |
|        | EIF2AK2 |  |
|        | NANS    |  |
|        | PABPN1  |  |
|        | STRAP   |  |
|        | UBXN1   |  |
|        | YME1L1  |  |

**Table S1:** Proteins found in RIME experiments.
