# Supplementary material for: A neomorphic mutation in the interferon activation domain of IRF4 causes a dominant primary immunodeficiency
Source: PubMed Central journal article supplement — J Exp Med. 2023 Mar 14;220(6):e20221292. doi: 10.1084/jem.20221292 (PMC10037104; doi:10.1084/jem.20221292), 2023-03-14
Supplement: JEM_20221292_TableS2.pdf [file JEM_20221292_TableS2.pdf]

| Target                         | Clone    | Metal |
|--------------------------------|----------|-------|
| MaxPar Direct Immune Profiling |          |       |
| CD45                           | HI30     | 89Y   |
| Live/dead indicator            | N/A      | 103Rh |
| CD196 (CCR6)                   | G034E3   | 141Pr |
| CD123                          | 6H6      | 143Nd |
| CD19 (CCR6)                    | HIB19    | 144Nd |
| CD4                            | RPA-T4   | 145Nd |
| CD8a                           | RPA-T8   | 146Nd |
| CD11c                          | Bu15     | 147Sm |
| CD16                           | 3G8      | 148Nd |
| CD45RO                         | UCHL1    | 149Sm |
| CD45RA                         | HI100    | 150Nd |
| CD161                          | HP-3G10  | 151Eu |
| CD194 (CCR4)                   | L291H4   | 152Sm |
| CD25                           | BC96     | 153Eu |
| CD27                           | O323     | 154Sm |
| CD57                           | HCD57    | 155Gd |
| CD183 (CXCR3)                  | G025H7   | 156Gd |
| CD185 (CXCR5)                  | J252D4   | 158Gd |
| CD28                           | CD28.2   | 160Gd |
| CD38                           | HB-7     | 161Dy |
| CD56                           | NCAM16.2 | 163Dy |
| TCRgamma delta                 | B1       | 164Dy |
| CD294                          | BM16     | 166Dy |
| CD197 (CCR7)                   | G043H7   | 167Er |
| CD14                           | 63D3     | 168Er |
| CD38                           | UCHT1    | 170Er |
| CD20                           | 2H7      | 171Yb |
| CD66b                          | G10F5    | 172Yb |
| HLA-DR                         | LN3      | 173Yb |
| IgD                            | IA6-2    | 174Yb |
| CD127                          | A019D5   | 176Yb |
| T cell expansion panel 2       |          |       |
| CD11a                          | HI111    | 142Nd |
| CD366 (TIM-3)                  | F38-2E2  | 159Tb |
| CD95 (FAS)                     | DX2      | 162Dy |
| CD279 (PD-1)                   | EH12.2H7 | 165Ho |
| CD278 (ICOS)                   | C398.4A  | 169Tm |
| CD184 (CXCR4)                  | 12G5     | 175Lu |
| TIGIT                          | MBSA43   | 209Bi |

**Table S2:** The antibodies used in CyTOF experiments.
